# Supplementary material for: Identification of Potential Antiviral Inhibitors from Hydroxychloroquine and 1,2,4,5-Tetraoxanes Analogues and Investigation of the Mechanism of Action in SARS-CoV-2
Source: MDPI journal article supplement (doi:10.3390/ijms23031781), 2022-02-04
Supplement: s1 [file s1]

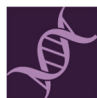

## Supplementary Materials

**Figure S1.** Two-dimensional (2D) structures of molecules set.

**Table S1.** Computational parameters of oral bioavailability following the Lipinski rule (R5) for the molecules.

**Table S2.** Computational pharmacokinetic parameters (ADME) of the structures.

**Table S3.** Computational parameters of USFDA rodent carcinogenicity. Ames mutagenicity. developmental toxicity potential. aerobic biodegradability. ocular irritancy and skin irritancy.

**Table S4.** Compliance of molecules with computational toxicity risk parameters.

**Table S5.** Binding affinity values of ligands at ACE2 and M<sup>pro</sup> receptors.

**Table S6.** Prediction of Synthetic Accessibility (SA) of the ligands

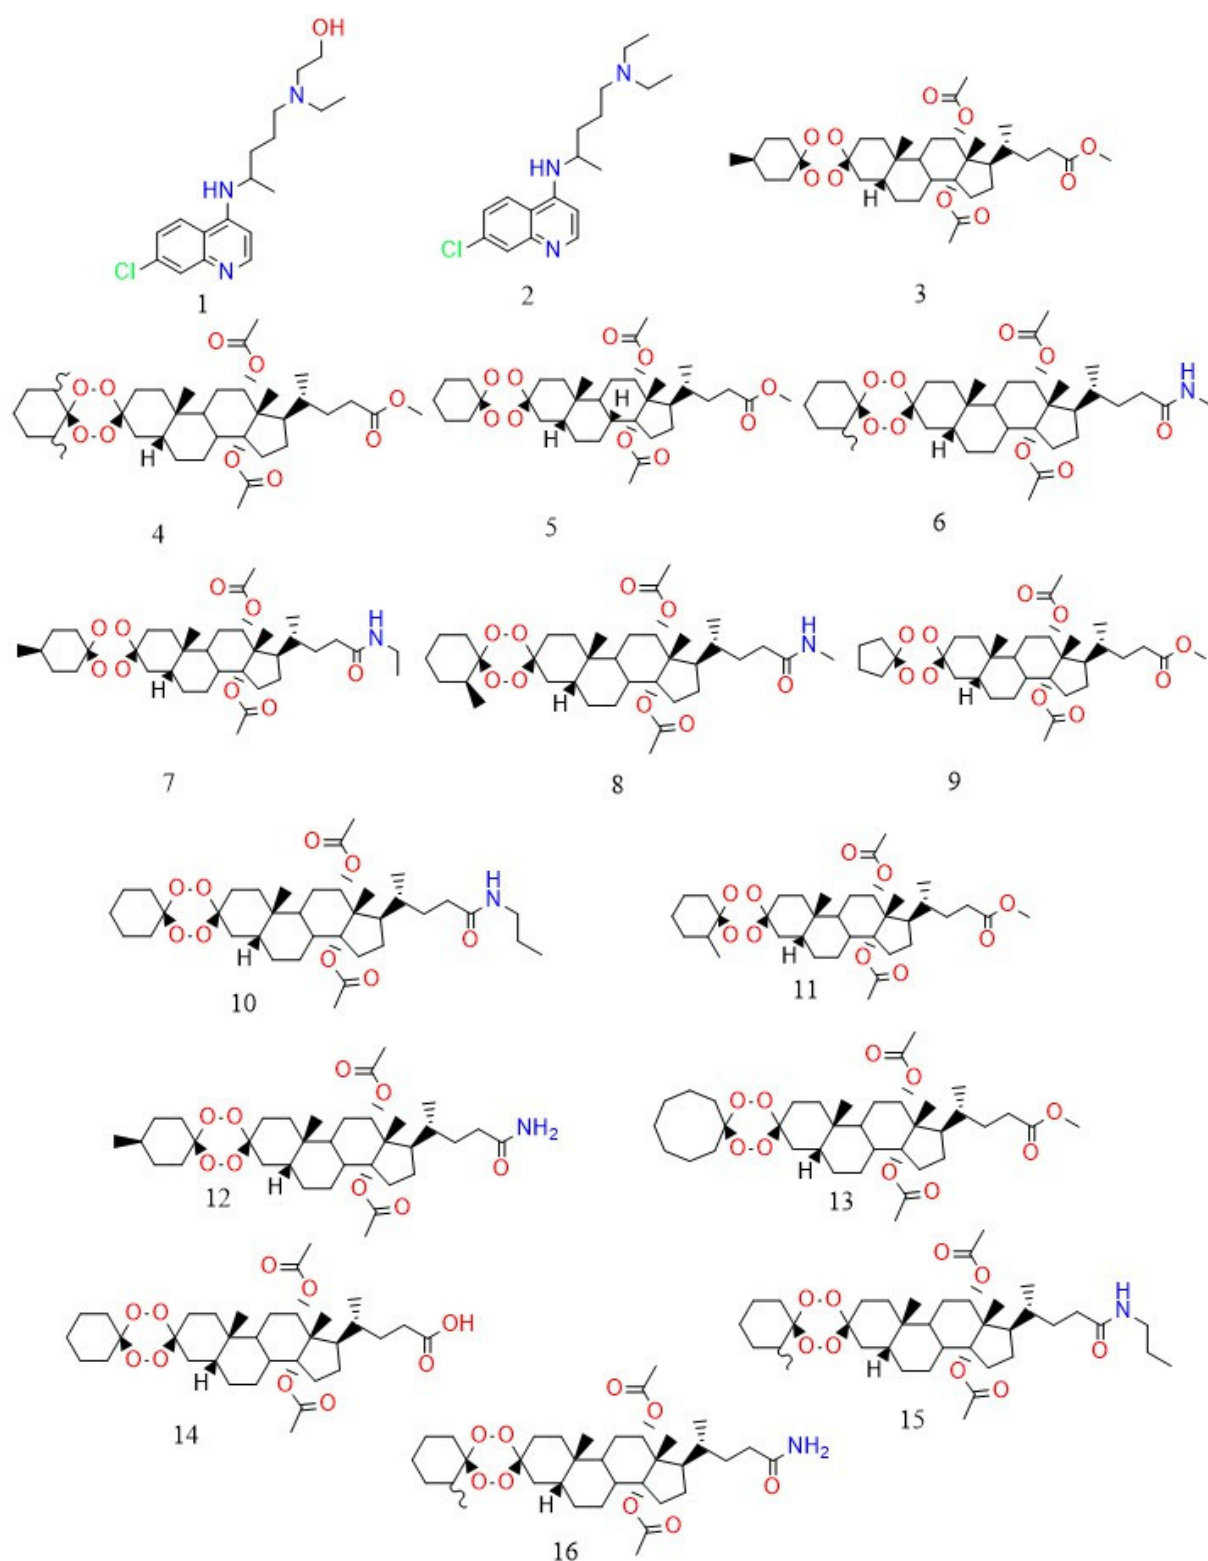

**Figure S1.** Two-dimensional (2D) structures of molecules set.

**Table S1.** Computational parameters of oral bioavailability following the Lipinski rule (R5) for the molecules.

| Molecules           | Oral Bioavailability   | MW      | Alog P | HBD  | HBA   | R5    |
|---------------------|------------------------|---------|--------|------|-------|-------|
| Normal range        | (<140 Å <sup>2</sup> ) | (<500)  | (≤5)   | (≤5) | (≤10) | Max 4 |
| Hydroxychloroquine  | 48.239                 | 335.872 | 3.457  | 2    | 4     | 0     |
| Chloroquine         | 27.423                 | 319.872 | 4.345  | 1    | 3     | 0     |
| MolPort-009-219-532 | 30.142                 | 355.471 | 4.755  | 0    | 4     | 0     |
| MolPort-045-904-593 | 59.791                 | 392.877 | 3.388  | 1    | 6     | 0     |
| MolPort-006-669-322 | 69.152                 | 338.485 | 3.250  | 2    | 3     | 0     |
| MolPort-010-847-948 | 88.170                 | 420.522 | 3.110  | 1    | 5     | 0     |
| MolPort-005-109-508 | 53.126                 | 423.548 | 4.042  | 0    | 5     | 0     |
| MolPort-009-624-542 | 73.642                 | 457.178 | 3.882  | 1    | 4     | 0     |
| MolPort-006-518-079 | 79.240                 | 424.414 | 4.012  | 1    | 4     | 0     |
| MolPort-007-760-271 | 68.395                 | 440.578 | 3.413  | 1    | 4     | 0     |
| MolPort-004-999-716 | 51.323                 | 484.626 | 3.919  | 1    | 5     | 0     |
| MolPort-006-669-183 | 76.995                 | 448.619 | 3.550  | 1    | 4     | 0     |
| MolPort-005-116-387 | 53.958                 | 374.474 | 3.285  | 0    | 5     | 0     |
| MolPort-006-521-801 | 78.463                 | 460.95  | 3.950  | 0    | 5     | 0     |
| MolPort-006-669-319 | 73.642                 | 399.568 | 3.682  | 1    | 4     | 0     |
| MolPort-005-052-112 | 55.203                 | 415.956 | 3.815  | 2    | 4     | 0     |
| MolPort-009-089-697 | 69.152                 | 388.888 | 3.877  | 2    | 3     | 0     |
| MolPort-028-816-982 | 65.272                 | 417.514 | 3.995  | 1    | 4     | 0     |
| MolPort-007-913-109 | 54.676                 | 405.554 | 4.381  | 1    | 5     | 0     |
| MolPort-005-026-316 | 69.152                 | 452.561 | 3.821  | 2    | 3     | 0     |
| MolPort-007-913-113 | 81.434                 | 433.564 | 4.294  | 2    | 5     | 0     |
| MolPort-002-297-028 | 51.485                 | 442.774 | 4.723  | 2    | 4     | 0     |
| MolPort-004-063-477 | 61.951                 | 380.819 | 4.353  | 0    | 6     | 0     |
| MolPort-005-126-472 | 45.027                 | 358.474 | 3.296  | 0    | 4     | 0     |
| MolPort-002-604-292 | 61.391                 | 364.82  | 4.456  | 0    | 5     | 0     |
| MolPort-004-996-519 | 51.323                 | 414.513 | 4.588  | 1    | 4     | 0     |
| MolPort-009-239-957 | 58.766                 | 430.56  | 4.890  | 0    | 6     | 0     |
| MolPort-006-669-332 | 56.341                 | 337.497 | 4.075  | 1    | 3     | 0     |
| MolPort-005-060-605 | 45.027                 | 398.538 | 4.677  | 0    | 4     | 0     |
| MolPort-005-028-274 | 69.152                 | 416.461 | 3.347  | 2    | 3     | 0     |
| MolPort-044-400-535 | 68.224                 | 384.469 | 3.866  | 1    | 5     | 0     |
| MolPort-005-695-540 | 51.323                 | 447.365 | 3.482  | 1    | 4     | 0     |
| MolPort-039-018-869 | 65.357                 | 413.576 | 4.848  | 2    | 4     | 0     |
| MolPort-002-714-306 | 60.986                 | 372.481 | 3.974  | 0    | 6     | 0     |
| MolPort-007-913-256 | 81.434                 | 433.564 | 4.292  | 2    | 5     | 0     |
| MolPort-003-330-718 | 90.501                 | 437.576 | 2.936  | 1    | 6     | 0     |
| MolPort-000-848-037 | 71.052                 | 436.543 | 3.773  | 1    | 5     | 0     |
| MolPort-005-008-705 | 68.624                 | 410.506 | 4.338  | 1    | 4     | 0     |
| MolPort-004-042-669 | 66.740                 | 417.518 | 3.416  | 0    | 6     | 0     |
| MolPort-007-913-111 | 54.676                 | 419.581 | 4.826  | 1    | 5     | 0     |
| MolPort-007-913-243 | 81.434                 | 419.538 | 3.973  | 2    | 5     | 0     |
| MolPort-002-693-933 | 50.364                 | 324.417 | 4.586  | 1    | 3     | 0     |

---

|                     |        |         |       |   |   |   |
|---------------------|--------|---------|-------|---|---|---|
| MolPort-005-083-430 | 40.152 | 426.618 | 4.778 | 0 | 5 | 0 |
| MolPort-002-240-450 | 64.744 | 405.508 | 4.338 | 0 | 7 | 0 |
| MolPort-010-232-623 | 59.166 | 486.548 | 4.037 | 0 | 5 | 0 |
| MolPort-028-787-272 | 59.694 | 342.497 | 2.944 | 1 | 4 | 0 |
| MolPort-002-513-970 | 72.410 | 403.555 | 4.247 | 2 | 4 | 0 |
| MolPort-007-913-196 | 81.434 | 419.538 | 3.838 | 2 | 5 | 0 |
| MolPort-005-131-430 | 45.746 | 423.591 | 4.054 | 1 | 4 | 0 |
| MolPort-001-683-506 | 61.391 | 366.836 | 4.978 | 0 | 5 | 0 |
| MolPort-044-684-282 | 63.574 | 399.569 | 4.505 | 2 | 3 | 0 |
| MolPort-009-499-144 | 80.327 | 398.376 | 3.166 | 2 | 4 | 0 |
| MolPort-010-813-978 | 92.050 | 405.511 | 2.548 | 2 | 4 | 0 |
| MolPort-005-002-644 | 60.253 | 494.665 | 4.586 | 1 | 5 | 0 |
| MolPort-009-511-439 | 84.227 | 498.562 | 3.494 | 2 | 5 | 0 |
| MolPort-009-647-594 | 79.240 | 424.533 | 3.662 | 1 | 4 | 0 |

---

**Table S2.** Computational pharmacokinetic parameters (ADME) of the structures.

| Molecules           | PPB                    | Hepatotoxicidade  | CYP2D6 Binding        | Solubility | BBB           | IA       |
|---------------------|------------------------|-------------------|-----------------------|------------|---------------|----------|
| Hydroxychloroquine  | false (poorly bounded) | true (toxic)      | true (inhibitor)      | 3 (good)   | 1 (good)      | 0 (good) |
| Chloroquine         | true (highly bounded)  | true (toxic)      | true (inhibitor)      | 2 (low)    | 0 (very good) | 0 (good) |
| MolPort-009-219-532 | true (highly bounded)  | false (non-toxic) | true (inhibitor)      | 2 (low)    | 0 (very good) | 0 (good) |
| MolPort-045-904-593 | true (highly bounded)  | false (non-toxic) | true (inhibitor)      | 2 (low)    | 2 (medium)    | 0 (good) |
| MolPort-006-669-322 | true (highly bounded)  | false (non-toxic) | false (non-inhibitor) | 3 (good)   | 2 (medium)    | 0 (good) |
| MolPort-010-847-948 | true (highly bounded)  | false (non-toxic) | false (non-inhibitor) | 2 (low)    | 3 (low)       | 0 (good) |
| MolPort-005-109-508 | true (highly bounded)  | false (non-toxic) | false (non-inhibitor) | 2 (low)    | 1 (good)      | 0 (good) |
| MolPort-009-624-542 | true (highly bounded)  | false (non-toxic) | false (non-inhibitor) | 2 (low)    | 2 (medium)    | 0 (good) |
| MolPort-006-518-079 | true (highly bounded)  | false (non-toxic) | false (non-inhibitor) | 2 (low)    | 2 (medium)    | 0 (good) |
| MolPort-007-760-271 | true (highly bounded)  | false (non-toxic) | false (non-inhibitor) | 2 (low)    | 2 (medium)    | 0 (good) |
| MolPort-004-999-716 | false (poorly bounded) | false (non-toxic) | false (non-inhibitor) | 2 (low)    | 1 (good)      | 0 (good) |
| MolPort-006-669-183 | true (highly bounded)  | false (non-toxic) | false (non-inhibitor) | 2 (low)    | 2 (medium)    | 0 (good) |
| MolPort-005-116-387 | true (highly bounded)  | false (non-toxic) | false (non-inhibitor) | 2 (low)    | 1 (good)      | 0 (good) |
| MolPort-006-521-801 | true (highly bounded)  | false (non-toxic) | false (non-inhibitor) | 2 (low)    | 2 (medium)    | 0 (good) |
| MolPort-006-669-319 | true (highly bounded)  | false (non-toxic) | false (non-inhibitor) | 2 (low)    | 2 (medium)    | 0 (good) |
| MolPort-005-052-112 | true (highly bounded)  | false (non-toxic) | false (non-inhibitor) | 2 (low)    | 1 (good)      | 0 (good) |
| MolPort-009-089-697 | true (highly bounded)  | false (non-toxic) | false (non-inhibitor) | 2 (low)    | 2 (medium)    | 0 (good) |
| MolPort-028-816-982 | true (highly bounded)  | false (non-toxic) | false (non-inhibitor) | 2 (low)    | 1 (good)      | 0 (good) |
| MolPort-007-913-109 | true (highly bounded)  | false (non-toxic) | false (non-inhibitor) | 2 (low)    | 1 (good)      | 0 (good) |
| MolPort-005-026-316 | true (highly bounded)  | false (non-toxic) | false (non-inhibitor) | 2 (low)    | 2 (medium)    | 0 (good) |
| MolPort-007-913-113 | false (poorly bounded) | false (non-toxic) | false (non-inhibitor) | 2 (low)    | 2 (medium)    | 0 (good) |
| MolPort-002-297-028 | true (highly bounded)  | false (non-toxic) | true (inhibitor)      | 2 (low)    | 1 (good)      | 0 (good) |
| MolPort-004-063-477 | true (highly bounded)  | false (non-toxic) | false (non-inhibitor) | 2 (low)    | 1 (good)      | 0 (good) |
| MolPort-005-126-472 | true (highly bounded)  | false (non-toxic) | true (inhibitor)      | 2 (low)    | 1 (good)      | 0 (good) |
| MolPort-002-604-292 | true (highly bounded)  | false (non-toxic) | false (non-inhibitor) | 2 (low)    | 1 (good)      | 0 (good) |
| MolPort-004-996-519 | true (highly bounded)  | false (non-toxic) | false (non-inhibitor) | 2 (low)    | 1 (good)      | 0 (good) |
| MolPort-009-239-957 | true (highly bounded)  | false (non-toxic) | false (non-inhibitor) | 2 (low)    | 1 (good)      | 0 (good) |
| MolPort-006-669-332 | true (highly bounded)  | false (non-toxic) | false (non-inhibitor) | 2 (low)    | 1 (good)      | 0 (good) |
| MolPort-005-060-605 | true (highly bounded)  | false (non-toxic) | false (non-inhibitor) | 2 (low)    | 1 (good)      | 0 (good) |
| MolPort-005-028-274 | true (highly bounded)  | false (non-toxic) | false (non-inhibitor) | 2 (low)    | 2 (medium)    | 0 (good) |
| MolPort-044-400-535 | true (highly bounded)  | false (non-toxic) | false (non-inhibitor) | 2 (low)    | 2 (medium)    | 0 (good) |
| MolPort-005-695-540 | true (highly bounded)  | false (non-toxic) | false (non-inhibitor) | 2 (low)    | 1 (good)      | 0 (good) |
| MolPort-039-018-869 | true (highly bounded)  | false (non-toxic) | false (non-inhibitor) | 1 (poor)   | 1 (good)      | 0 (good) |
| MolPort-002-714-306 | true (highly bounded)  | false (non-toxic) | false (non-inhibitor) | 2 (low)    | 1 (good)      | 0 (good) |
| MolPort-007-913-256 | true (highly bounded)  | false (non-toxic) | false (non-inhibitor) | 2 (low)    | 2 (medium)    | 0 (good) |
| MolPort-003-330-718 | true (highly bounded)  | false (non-toxic) | false (non-inhibitor) | 2 (low)    | 3 (low)       | 0 (good) |
| MolPort-000-848-037 | true (highly bounded)  | false (non-toxic) | false (non-inhibitor) | 2 (low)    | 2 (medium)    | 0 (good) |
| MolPort-005-008-705 | true (highly bounded)  | false (non-toxic) | false (non-inhibitor) | 2 (low)    | 1 (good)      | 0 (good) |
| MolPort-004-042-669 | true (highly bounded)  | false (non-toxic) | false (non-inhibitor) | 2 (low)    | 2 (medium)    | 0 (good) |
| MolPort-007-913-111 | false (poorly bounded) | false (non-toxic) | false (non-inhibitor) | 2 (low)    | 1 (good)      | 0 (good) |
| MolPort-007-913-243 | true (highly bounded)  | false (non-toxic) | false (non-inhibitor) | 2 (low)    | 2 (medium)    | 0 (good) |
| MolPort-002-693-933 | true (highly bounded)  | false (non-toxic) | false (non-inhibitor) | 2 (low)    | 1 (good)      | 0 (good) |
| MolPort-005-083-430 | true (highly bounded)  | false (non-toxic) | true (inhibitor)      | 2 (low)    | 1 (good)      | 0 (good) |

---

|                     |                        |                   |                       |          |            |          |
|---------------------|------------------------|-------------------|-----------------------|----------|------------|----------|
| MolPort-002-240-450 | true (highly bounded)  | false (non-toxic) | false (non-inhibitor) | 2 (low)  | 1 (good)   | 0 (good) |
| MolPort-010-232-623 | true (highly bounded)  | false (non-toxic) | false (non-inhibitor) | 2 (low)  | 1 (good)   | 0 (good) |
| MolPort-028-787-272 | true (highly bounded)  | false (non-toxic) | false (non-inhibitor) | 3 (good) | 2 (medium) | 0 (good) |
| MolPort-002-513-970 | true (highly bounded)  | false (non-toxic) | false (non-inhibitor) | 2 (low)  | 1 (good)   | 0 (good) |
| MolPort-007-913-196 | false (poorly bounded) | false (non-toxic) | false (non-inhibitor) | 2 (low)  | 2 (medium) | 0 (good) |
| MolPort-005-131-430 | true (highly bounded)  | false (non-toxic) | false (non-inhibitor) | 2 (low)  | 1 (good)   | 0 (good) |
| MolPort-001-683-506 | true (highly bounded)  | false (non-toxic) | false (non-inhibitor) | 2 (low)  | 1 (good)   | 0 (good) |
| MolPort-044-684-282 | true (highly bounded)  | false (non-toxic) | false (non-inhibitor) | 2 (low)  | 1 (good)   | 0 (good) |
| MolPort-009-499-144 | true (highly bounded)  | false (non-toxic) | false (non-inhibitor) | 2 (low)  | 2 (medium) | 0 (good) |
| MolPort-010-813-978 | true (highly bounded)  | false (non-toxic) | false (non-inhibitor) | 3 (good) | 3 (low)    | 0 (good) |
| MolPort-005-002-644 | false (poorly bounded) | false (non-toxic) | false (non-inhibitor) | 2 (low)  | 1 (good)   | 0 (good) |
| MolPort-009-511-439 | true (highly bounded)  | false (non-toxic) | false (non-inhibitor) | 2 (low)  | 2 (medium) | 0 (good) |
| MolPort-009-647-594 | true (highly bounded)  | false (non-toxic) | false (non-inhibitor) | 2 (low)  | 2 (medium) | 0 (good) |

---

**Table S3.** Computational parameters of USFDA rodent carcinogenicity. Ames mutagenicity. developmental toxicity potential. aerobic biodegradability. ocular irritancy and skin irritancy.

| Molecules           | Mouse Female      | Mouse Male        | Rat Female        | Rat Male          | Ames Mutagenicity | DTP       | Skin Irritancy | AB             |
|---------------------|-------------------|-------------------|-------------------|-------------------|-------------------|-----------|----------------|----------------|
| Hydroxychloroquine  | Non-Carcinogen    | Non-Carcinogen    | Non-Carcinogen    | Non-Carcinogen    | Mutagen           | Toxic     | None           | Non-Degradable |
| Chloroquine         | Non-Carcinogen    | Non-Carcinogen    | Non-Carcinogen    | Non-Carcinogen    | Mutagen           | Non-Toxic | None           | Non-Degradable |
| MolPort-009-219-532 | Multi-Carcinogen  | Non-Carcinogen    | Non-Carcinogen    | Non-Carcinogen    | Non-Mutagen       | Toxic     | None           | Non-Degradable |
| MolPort-045-904-593 | Non-Carcinogen    | Non-Carcinogen    | Non-Carcinogen    | Non-Carcinogen    | Non-Mutagen       | Toxic     | Mild           | Non-Degradable |
| MolPort-006-669-322 | Non-Carcinogen    | Multi-Carcinogen  | Non-Carcinogen    | Multi-Carcinogen  | Non-Mutagen       | Non-Toxic | Moderate       | Degradable     |
| MolPort-010-847-948 | Single-Carcinogen | Non-Carcinogen    | Non-Carcinogen    | Non-Carcinogen    | Non-Mutagen       | Non-Toxic | Mild           | Degradable     |
| MolPort-005-109-508 | Non-Carcinogen    | Non-Carcinogen    | Non-Carcinogen    | Non-Carcinogen    | Non-Mutagen       | Toxic     | None           | Degradable     |
| MolPort-009-624-542 | Non-Carcinogen    | Non-Carcinogen    | Non-Carcinogen    | Non-Carcinogen    | Non-Mutagen       | Toxic     | None           | Degradable     |
| MolPort-006-518-079 | Non-Carcinogen    | Multi-Carcinogen  | Non-Carcinogen    | Non-Carcinogen    | Non-Mutagen       | Non-Toxic | None           | Non-Degradable |
| MolPort-007-760-271 | Non-Carcinogen    | Non-Carcinogen    | Non-Carcinogen    | Non-Carcinogen    | Non-Mutagen       | Toxic     | None           | Degradable     |
| MolPort-004-999-716 | Non-Carcinogen    | Non-Carcinogen    | Non-Carcinogen    | Non-Carcinogen    | Non-Mutagen       | Non-Toxic | None           | Degradable     |
| MolPort-006-669-183 | Non-Carcinogen    | Single-Carcinogen | Single-Carcinogen | Non-Carcinogen    | Non-Mutagen       | Non-Toxic | Mild           | Degradable     |
| MolPort-005-116-387 | Non-Carcinogen    | Non-Carcinogen    | Non-Carcinogen    | Non-Carcinogen    | Non-Mutagen       | Toxic     | None           | Non-Degradable |
| MolPort-006-521-801 | Non-Carcinogen    | Single-Carcinogen | Non-Carcinogen    | Non-Carcinogen    | Non-Mutagen       | Toxic     | None           | Non-Degradable |
| MolPort-006-669-319 | Non-Carcinogen    | Non-Carcinogen    | Non-Carcinogen    | Single-Carcinogen | Non-Mutagen       | Toxic     | None           | Degradable     |
| MolPort-005-052-112 | Non-Carcinogen    | Non-Carcinogen    | Non-Carcinogen    | Non-Carcinogen    | Non-Mutagen       | Toxic     | None           | Non-Degradable |
| MolPort-009-089-697 | Multi-Carcinogen  | Non-Carcinogen    | Non-Carcinogen    | Non-Carcinogen    | Non-Mutagen       | Toxic     | None           | Non-Degradable |
| MolPort-028-816-982 | Non-Carcinogen    | Non-Carcinogen    | Non-Carcinogen    | Non-Carcinogen    | Non-Mutagen       | Non-Toxic | None           | Non-Degradable |
| MolPort-007-913-109 | Non-Carcinogen    | Non-Carcinogen    | Non-Carcinogen    | Non-Carcinogen    | Non-Mutagen       | Toxic     | None           | Non-Degradable |
| MolPort-005-026-316 | Non-Carcinogen    | Non-Carcinogen    | Single-Carcinogen | Non-Carcinogen    | Non-Mutagen       | Toxic     | Mild           | Non-Degradable |
| MolPort-007-913-113 | Non-Carcinogen    | Non-Carcinogen    | Non-Carcinogen    | Non-Carcinogen    | Non-Mutagen       | Non-Toxic | None           | Degradable     |
| MolPort-002-297-028 | Non-Carcinogen    | Non-Carcinogen    | Single-Carcinogen | Non-Carcinogen    | Non-Mutagen       | Non-Toxic | Mild           | Degradable     |
| MolPort-004-063-477 | Non-Carcinogen    | Non-Carcinogen    | Non-Carcinogen    | Non-Carcinogen    | Non-Mutagen       | Toxic     | None           | Non-Degradable |
| MolPort-005-126-472 | Non-Carcinogen    | Multi-Carcinogen  | Single-Carcinogen | Non-Carcinogen    | Non-Mutagen       | Non-Toxic | Moderate       | Degradable     |
| MolPort-002-604-292 | Non-Carcinogen    | Multi-Carcinogen  | Non-Carcinogen    | Non-Carcinogen    | Non-Mutagen       | Non-Toxic | Mild           | Degradable     |
| MolPort-004-996-519 | Non-Carcinogen    | Non-Carcinogen    | Single-Carcinogen | Non-Carcinogen    | Non-Mutagen       | Non-Toxic | None           | Degradable     |
| MolPort-009-239-957 | Non-Carcinogen    | Non-Carcinogen    | Non-Carcinogen    | Non-Carcinogen    | Non-Mutagen       | Non-Toxic | None           | Degradable     |

|                     |                  |                   |                   |                   |             |           |          |                |
|---------------------|------------------|-------------------|-------------------|-------------------|-------------|-----------|----------|----------------|
| MolPort-006-669-332 | Non-Carcinogen   | Non-Carcinogen    | Non-Carcinogen    | Non-Carcinogen    | Non-Mutagen | Toxic     | None     | Non-Degradable |
| MolPort-005-060-605 | Non-Carcinogen   | Non-Carcinogen    | Non-Carcinogen    | Non-Carcinogen    | Non-Mutagen | Non-Toxic | None     | Non-Degradable |
| MolPort-005-028-274 | Non-Carcinogen   | Multi-Carcinogen  | Multi-Carcinogen  | Single-Carcinogen | Non-Mutagen | Toxic     | Mild     | Non-Degradable |
| MolPort-044-400-535 | Non-Carcinogen   | Non-Carcinogen    | Non-Carcinogen    | Non-Carcinogen    | Non-Mutagen | Non-Toxic | None     | Non-Degradable |
| MolPort-005-695-540 | Non-Carcinogen   | Single-Carcinogen | Non-Carcinogen    | Non-Carcinogen    | Non-Mutagen | Non-Toxic | None     | Non-Degradable |
| MolPort-039-018-869 | Non-Carcinogen   | Non-Carcinogen    | Single-Carcinogen | Non-Carcinogen    | Non-Mutagen | Toxic     | None     | Non-Degradable |
| MolPort-002-714-306 | Non-Carcinogen   | Non-Carcinogen    | Non-Carcinogen    | Non-Carcinogen    | Non-Mutagen | Toxic     | None     | Degradable     |
| MolPort-007-913-256 | Non-Carcinogen   | Single-Carcinogen | Single-Carcinogen | Non-Carcinogen    | Non-Mutagen | Toxic     | None     | Degradable     |
| MolPort-003-330-718 | Non-Carcinogen   | Non-Carcinogen    | Non-Carcinogen    | Non-Carcinogen    | Non-Mutagen | Toxic     | Mild     | Degradable     |
| MolPort-000-848-037 | Non-Carcinogen   | Non-Carcinogen    | Non-Carcinogen    | Non-Carcinogen    | Non-Mutagen | Toxic     | None     | Non-Degradable |
| MolPort-005-008-705 | Non-Carcinogen   | Non-Carcinogen    | Non-Carcinogen    | Non-Carcinogen    | Non-Mutagen | Non-Toxic | None     | Non-Degradable |
| MolPort-004-042-669 | Non-Carcinogen   | Non-Carcinogen    | Non-Carcinogen    | Non-Carcinogen    | Non-Mutagen | Toxic     | None     | Non-Degradable |
| MolPort-007-913-111 | Multi-Carcinogen | Non-Carcinogen    | Single-Carcinogen | Non-Carcinogen    | Non-Mutagen | Non-Toxic | Mild     | Degradable     |
| MolPort-007-913-243 | Non-Carcinogen   | Non-Carcinogen    | Non-Carcinogen    | Non-Carcinogen    | Non-Mutagen | Toxic     | Mild     | Non-Degradable |
| MolPort-002-693-933 | Multi-Carcinogen | Multi-Carcinogen  | Single-Carcinogen | Single-Carcinogen | Non-Mutagen | Toxic     | Mild     | Degradable     |
| MolPort-005-083-430 | Non-Carcinogen   | Non-Carcinogen    | Non-Carcinogen    | Non-Carcinogen    | Non-Mutagen | Non-Toxic | None     | Non-Degradable |
| MolPort-002-240-450 | Non-Carcinogen   | Non-Carcinogen    | Non-Carcinogen    | Non-Carcinogen    | Non-Mutagen | Non-Toxic | Mild     | Non-Degradable |
| MolPort-010-232-623 | Non-Carcinogen   | Non-Carcinogen    | Single-Carcinogen | Single-Carcinogen | Non-Mutagen | Non-Toxic | Mild     | Degradable     |
| MolPort-028-787-272 | Non-Carcinogen   | Single-Carcinogen | Non-Carcinogen    | Non-Carcinogen    | Non-Mutagen | Toxic     | None     | Degradable     |
| MolPort-002-513-970 | Non-Carcinogen   | Non-Carcinogen    | Non-Carcinogen    | Non-Carcinogen    | Non-Mutagen | Non-Toxic | None     | Non-Degradable |
| MolPort-007-913-196 | Non-Carcinogen   | Non-Carcinogen    | Non-Carcinogen    | Non-Carcinogen    | Non-Mutagen | Non-Toxic | None     | Non-Degradable |
| MolPort-005-131-430 | Non-Carcinogen   | Non-Carcinogen    | Non-Carcinogen    | Non-Carcinogen    | Non-Mutagen | Toxic     | None     | Non-Degradable |
| MolPort-001-683-506 | Non-Carcinogen   | Non-Carcinogen    | Non-Carcinogen    | Non-Carcinogen    | Non-Mutagen | Non-Toxic | None     | Non-Degradable |
| MolPort-044-684-282 | Non-Carcinogen   | Non-Carcinogen    | Non-Carcinogen    | Non-Carcinogen    | Non-Mutagen | Non-Toxic | Mild     | Degradable     |
| MolPort-009-499-144 | Non-Carcinogen   | Non-Carcinogen    | Non-Carcinogen    | Non-Carcinogen    | Mutagen     | Toxic     | None     | Non-Degradable |
| MolPort-010-813-978 | Non-Carcinogen   | Non-Carcinogen    | Non-Carcinogen    | Non-Carcinogen    | Mutagen     | Non-Toxic | None     | Non-Degradable |
| MolPort-005-002-644 | Multi-Carcinogen | Non-Carcinogen    | Non-Carcinogen    | Non-Carcinogen    | Non-Mutagen | Toxic     | None     | Non-Degradable |
| MolPort-009-511-439 | Non-Carcinogen   | Non-Carcinogen    | Non-Carcinogen    | Non-Carcinogen    | Non-Mutagen | Toxic     | Mild     | Non-Degradable |
| MolPort-009-647-594 | Non-Carcinogen   | Multi-Carcinogen  | Non-Carcinogen    | Multi-Carcinogen  | Non-Mutagen | Non-Toxic | Moderate | Degradable     |



**Table S4.** Compliance of molecules with computational toxicity risk parameters.

| Molecules           | Rate Oral LD <sub>50</sub><br>(g/kg Body Weight) | Daphnia EC <sub>50</sub><br>(mg/L) | Rat Chronic LOAEL<br>(g/kg Body Weight) | Fathead Minnow LC <sub>50</sub><br>(g/L) |
|---------------------|--------------------------------------------------|------------------------------------|-----------------------------------------|------------------------------------------|
| Hydroxychloroquine  | 0.206628                                         | 34.6185                            | 0.0329227                               | 0.0240234                                |
| Chloroquine         | 0.15613                                          | 2.82639                            | 0.0241049                               | 0.00638702                               |
| MolPort-009-219-532 | 0.519074                                         | 0.0113327                          | 0.0143892                               | 0.000647581                              |
| MolPort-045-904-593 | 1.63109                                          | 0.480538                           | 0.00612089                              | 0.000682701                              |
| MolPort-006-669-322 | 2.53059                                          | 0.578267                           | 0.00754108                              | 0.000287506                              |
| MolPort-010-847-948 | 1.50569                                          | 1.64518                            | 0.0230496                               | 0.00283626                               |
| MolPort-005-109-508 | 2.34626                                          | 0.55976                            | 0.00169879                              | 1.93741e-05                              |
| MolPort-009-624-542 | 7.96501                                          | 0.0686546                          | 0.0379408                               | 6.09624e-05                              |
| MolPort-006-518-079 | 0.4479                                           | 0.743687                           | 0.00828422                              | 0.000317579                              |
| MolPort-007-760-271 | 1.05304                                          | 0.694215                           | 0.00751075                              | 0.000890254                              |
| MolPort-004-999-716 | 0.215143                                         | 0.136903                           | 0.00160099                              | 6.72694e-05                              |
| MolPort-006-669-183 | 1.66476                                          | 0.814212                           | 0.00664927                              | 2.29034e-05                              |
| MolPort-005-116-387 | 1.21449                                          | 0.533122                           | 0.0191592                               | 0.00710619                               |
| MolPort-006-521-801 | 1.18007                                          | 1.43138                            | 0.0114201                               | 0.000521094                              |
| MolPort-006-669-319 | 6.67192                                          | 0.911401                           | 0.00503748                              | 3.57542e-05                              |
| MolPort-005-052-112 | 1.55741                                          | 0.937148                           | 0.0131351                               | 0.00548019                               |
| MolPort-009-089-697 | 4.62639                                          | 2.19233                            | 0.0595124                               | 0.00338829                               |
| MolPort-028-816-982 | 0.344187                                         | 0.434683                           | 0.00352219                              | 0.000933634                              |
| MolPort-007-913-109 | 1.66563                                          | 0.0503399                          | 0.0550836                               | 0.000698277                              |
| MolPort-005-026-316 | 0.939254                                         | 0.38515                            | 0.0318489                               | 0.000962445                              |
| MolPort-007-913-113 | 7.64343                                          | 0.150338                           | 0.0426269                               | 0.000189959                              |
| MolPort-002-297-028 | 10.5937                                          | 0.208959                           | 0.0888331                               | 0.0011936                                |
| MolPort-004-063-477 | 3.00361                                          | 0.186291                           | 0.0168658                               | 0.00032414                               |
| MolPort-005-126-472 | 2.73546                                          | 0.470462                           | 0.0188029                               | 0.00732731                               |
| MolPort-002-604-292 | 4.22948                                          | 0.391261                           | 0.0418871                               | 8.11418e-05                              |
| MolPort-004-996-519 | 0.866938                                         | 0.394266                           | 0.00450013                              | 0.000517998                              |
| MolPort-009-239-957 | 8.37807                                          | 0.0321625                          | 0.00705534                              | 2.06246e-05                              |
| MolPort-006-669-332 | 4.56936                                          | 0.694498                           | 0.00562308                              | 0.000224901                              |
| MolPort-005-060-605 | 4.92316                                          | 0.103711                           | 0.00508813                              | 0.000404192                              |
| MolPort-005-028-274 | 5.52822                                          | 0.370371                           | 0.0209951                               | 0.000572707                              |
| MolPort-044-400-535 | 1.39146                                          | 0.590401                           | 0.0250407                               | 0.00143846                               |
| MolPort-005-695-540 | 1.02577                                          | 0.84207                            | 0.0178195                               | 0.00177727                               |
| MolPort-039-018-869 | 0.115168                                         | 0.131652                           | 0.0027505                               | 0.000563123                              |
| MolPort-002-714-306 | 4.97782                                          | 0.307299                           | 0.085262                                | 0.00116953                               |
| MolPort-007-913-256 | 5.21469                                          | 0.282713                           | 0.0450132                               | 0.000107131                              |
| MolPort-003-330-718 | 0.208377                                         | 0.170916                           | 0.0179479                               | 0.000560762                              |
| MolPort-000-848-037 | 1.16646                                          | 2.95073                            | 0.078792                                | 0.00222931                               |
| MolPort-005-008-705 | 0.880832                                         | 0.186796                           | 0.00764375                              | 0.0011703                                |
| MolPort-004-042-669 | 0.818649                                         | 1.15746                            | 0.0243816                               | 0.000426359                              |
| MolPort-007-913-111 | 1.80343                                          | 0.021842                           | 0.0514566                               | 0.000327461                              |
| MolPort-007-913-243 | 5.22694                                          | 0.284565                           | 0.0374126                               | 0.000354254                              |
| MolPort-002-693-933 | 1.55997                                          | 0.441939                           | 0.0663394                               | 0.000233932                              |
| MolPort-005-083-430 | 0.0634634                                        | 0.719656                           | 0.0137068                               | 0.000147288                              |

|                     |          |           |            |             |
|---------------------|----------|-----------|------------|-------------|
| MolPort-002-240-450 | 0.780211 | 0.0749317 | 0.00657294 | 5.79877e-05 |
| MolPort-010-232-623 | 0.153435 | 1.63212   | 0.00769818 | 0.000178307 |
| MolPort-028-787-272 | 1.42423  | 0.753566  | 0.0498866  | 0.00776433  |
| MolPort-002-513-970 | 2.11162  | 0.919901  | 0.00532493 | 0.000313351 |
| MolPort-007-913-196 | 8.95623  | 0.227159  | 0.0397907  | 0.000360996 |
| MolPort-005-131-430 | 1.22613  | 0.819688  | 0.0146579  | 0.00196697  |
| MolPort-001-683-506 | 7.24965  | 0.132511  | 0.09593    | 0.000176762 |
| MolPort-044-684-282 | 4.42066  | 8.57627   | 0.0797648  | 0.00395037  |
| MolPort-009-499-144 | 1.06527  | 2.80075   | 0.0157899  | 0.00206903  |
| MolPort-010-813-978 | 3.40067  | 1.07902   | 0.0757667  | 0.0134553   |
| MolPort-005-002-644 | 0.923189 | 1.38632   | 0.00629606 | 0.000466151 |
| MolPort-009-511-439 | 6.92456  | 6.12515   | 0.0316054  | 0.000942829 |
| MolPort-009-647-594 | 0.243958 | 1.60554   | 0.105641   | 0.000273276 |

Table S4. (cont.) Compliance of molecules with computational toxicity risk parameters.

| Carcinogenic Potency TD <sub>50</sub> (mg/kg Body Weight/Day) |         |           |                                               |
|---------------------------------------------------------------|---------|-----------|-----------------------------------------------|
| Molecules                                                     | Mouse   | Rat       | Rat Maximum Tolerated Dose (g/kg Body Weight) |
| Hydroxychloroquine                                            | 13.8683 | 1.30464   | 0.357402                                      |
| Chloroquine                                                   | 9.37816 | 0.376991  | 0.198368                                      |
| MolPort-009-219-532                                           | 147.089 | 51.5002   | 0.0895825                                     |
| MolPort-045-904-593                                           | 7.35069 | 1.12958   | 0.0477912                                     |
| MolPort-006-669-322                                           | 148.593 | 9.39412   | 0.0768844                                     |
| MolPort-010-847-948                                           | 70.9216 | 16.0969   | 0.0757447                                     |
| MolPort-005-109-508                                           | 3.57508 | 1.90891   | 0.0344346                                     |
| MolPort-009-624-542                                           | 457.629 | 34.106    | 0.0345973                                     |
| MolPort-006-518-079                                           | 75.1211 | 20.3393   | 0.0602477                                     |
| MolPort-007-760-271                                           | 59.6433 | 1.62658   | 0.0231931                                     |
| MolPort-004-999-716                                           | 40.3006 | 0.869267  | 0.0332906                                     |
| MolPort-006-669-183                                           | 57.8641 | 31.0552   | 0.0197732                                     |
| MolPort-005-116-387                                           | 27.1752 | 1.17545   | 0.0282444                                     |
| MolPort-006-521-801                                           | 23.4828 | 2.96423   | 0.0367389                                     |
| MolPort-006-669-319                                           | 342.56  | 912.033   | 0.0354822                                     |
| MolPort-005-052-112                                           | 96.6493 | 0.0346954 | 0.0842258                                     |
| MolPort-009-089-697                                           | 208.184 | 42.6662   | 0.148747                                      |
| MolPort-028-816-982                                           | 18.2215 | 0.208099  | 0.0371243                                     |
| MolPort-007-913-109                                           | 130.609 | 11.4046   | 0.0719888                                     |
| MolPort-005-026-316                                           | 134.391 | 22.0456   | 0.0718077                                     |
| MolPort-007-913-113                                           | 128.296 | 5.9438    | 0.0726094                                     |
| MolPort-002-297-028                                           | 228.499 | 70.4747   | 0.128577                                      |
| MolPort-004-063-477                                           | 75.5015 | 4.24665   | 0.0577177                                     |
| MolPort-005-126-472                                           | 81.1056 | 2.87661   | 0.0254416                                     |
| MolPort-002-604-292                                           | 260.873 | 26.4585   | 0.0605204                                     |
| MolPort-004-996-519                                           | 43.8161 | 1.23396   | 0.0827132                                     |
| MolPort-009-239-957                                           | 18.9886 | 24.2648   | 0.0275296                                     |
| MolPort-006-669-332                                           | 258.535 | 209.59    | 0.0634369                                     |

---

|                     |         |           |           |
|---------------------|---------|-----------|-----------|
| MolPort-005-060-605 | 3.36456 | 0.444702  | 0.0261636 |
| MolPort-005-028-274 | 329.611 | 25.0882   | 0.0888492 |
| MolPort-044-400-535 | 171.785 | 9.65002   | 0.0721541 |
| MolPort-005-695-540 | 94.0308 | 0.13559   | 0.0396155 |
| MolPort-039-018-869 | 1.48708 | 0.0176144 | 0.0500809 |
| MolPort-002-714-306 | 83.2817 | 12.4719   | 0.0284433 |
| MolPort-007-913-256 | 101.882 | 4.9379    | 0.065963  |
| MolPort-003-330-718 | 6.3469  | 23.2406   | 0.0370255 |
| MolPort-000-848-037 | 76.4916 | 27.4908   | 0.159796  |
| MolPort-005-008-705 | 95.0984 | 16.4368   | 0.0339939 |
| MolPort-004-042-669 | 178.986 | 9.74467   | 0.0257443 |
| MolPort-007-913-111 | 116.065 | 11.4898   | 0.0763168 |
| MolPort-007-913-243 | 113.128 | 4.53826   | 0.070089  |
| MolPort-002-693-933 | 80.9734 | 10.3455   | 0.0905694 |
| MolPort-005-083-430 | 8.85774 | 56.407    | 0.0435164 |
| MolPort-002-240-450 | 165.814 | 104.529   | 0.0470502 |
| MolPort-010-232-623 | 31.8064 | 1.23874   | 0.0156361 |
| MolPort-028-787-272 | 135.568 | 23.9449   | 0.0907596 |
| MolPort-002-513-970 | 36.8187 | 15.9221   | 0.0713243 |
| MolPort-007-913-196 | 146.94  | 6.39101   | 0.0766533 |
| MolPort-005-131-430 | 57.0133 | 0.0283448 | 0.0430569 |
| MolPort-001-683-506 | 388.024 | 27.0801   | 0.131733  |
| MolPort-044-684-282 | 51.1957 | 43.944    | 0.0884948 |
| MolPort-009-499-144 | 496.259 | 15.5986   | 0.041821  |
| MolPort-010-813-978 | 196.116 | 3.49483   | 0.0509963 |
| MolPort-005-002-644 | 61.2674 | 0.309164  | 0.0239698 |
| MolPort-009-511-439 | 138.172 | 51.058    | 0.0556744 |
| MolPort-009-647-594 | 284.682 | 33.2544   | 0.0671164 |

---

**Table S5.** Binding affinity values of ligands at ACE2 and M<sup>pro</sup> receptors.

| Ligand              | Binding Affinity (Kcal/mol) |                  |
|---------------------|-----------------------------|------------------|
|                     | ACE2                        | M <sup>pro</sup> |
| Hydroxychloroquine  | -7.755                      | -8.337           |
| Chloroquine         | -7.709                      | -7.158           |
| Lopinavir           | -7.866                      | -9.680           |
| Ritonavir           | -8.993                      | -9.594           |
| 11b                 | -8.441                      | -8.587           |
| MolPort-009-219-532 | -7.791                      | -9.012           |
| MolPort-045-904-593 | -7.352                      | -8.527           |
| MolPort-006-669-322 | -7.370                      | -7.972           |
| MolPort-010-847-948 | -7.610                      | -8.812           |
| MolPort-005-109-508 | -8.031                      | -8.235           |
| MolPort-009-624-542 | -7.717                      | -8.001           |
| MolPort-006-518-079 | -7.574                      | -8.451           |
| MolPort-007-760-271 | -7.952                      | -8.326           |
| MolPort-004-999-716 | -7.802                      | -7.588           |
| MolPort-006-669-183 | -7.974                      | -8.157           |
| MolPort-005-116-387 | -7.991                      | -8.842           |
| MolPort-006-521-801 | -8.147                      | -8.985           |
| MolPort-006-669-319 | -6.969                      | -8.283           |
| MolPort-005-052-112 | -7.655                      | -8.528           |
| MolPort-009-089-697 | -8.421                      | -7.894           |
| MolPort-028-816-982 | -8.111                      | -9.202           |
| MolPort-007-913-109 | -7.953                      | -7.936           |
| MolPort-005-026-316 | -8.213                      | -7.830           |
| MolPort-007-913-113 | -7.601                      | -8.147           |
| MolPort-002-297-028 | -8.116                      | -8.134           |
| MolPort-004-063-477 | -7.889                      | -8.515           |
| MolPort-005-126-472 | -7.062                      | -8.197           |
| MolPort-002-604-292 | -7.882                      | -8.116           |
| MolPort-004-996-519 | -8.033                      | -9.008           |
| MolPort-009-239-957 | -7.953                      | -8.963           |
| MolPort-006-669-332 | -7.574                      | -8.297           |
| MolPort-005-060-605 | -8.138                      | -9.076           |
| MolPort-005-028-274 | -8.116                      | -8.883           |
| MolPort-044-400-535 | -8.090                      | -8.552           |
| MolPort-005-695-540 | -7.847                      | -8.803           |
| MolPort-039-018-869 | -7.998                      | -8.247           |
| MolPort-002-714-306 | -7.853                      | -8.502           |
| MolPort-007-913-256 | -7.911                      | -8.786           |
| MolPort-003-330-718 | -7.833                      | -8.132           |
| MolPort-000-848-037 | -7.858                      | -8.099           |
| MolPort-005-008-705 | -8.197                      | -8.638           |

---

|                     |        |        |
|---------------------|--------|--------|
| MolPort-004-042-669 | -8.228 | -8.647 |
| MolPort-007-913-111 | -8.540 | -8.016 |
| MolPort-007-913-243 | -8.367 | -8.229 |
| MolPort-002-693-933 | -8.440 | -8.280 |
| MolPort-005-083-430 | -8.263 | -8.874 |
| MolPort-002-240-450 | -7.662 | -8.441 |
| MolPort-010-232-623 | -8.236 | -8.372 |
| MolPort-028-787-272 | -7.496 | -7.641 |
| MolPort-002-513-970 | -7.799 | -8.631 |
| MolPort-007-913-196 | -8.252 | -8.156 |
| MolPort-005-131-430 | -8.226 | -8.395 |
| MolPort-001-683-506 | -8.218 | -8.727 |
| MolPort-044-684-282 | -8.036 | -8.637 |
| MolPort-009-499-144 | -7.676 | -8.818 |
| MolPort-010-813-978 | -7.472 | -8.567 |
| MolPort-005-002-644 | -8.112 | -8.815 |
| MolPort-009-511-439 | -7.420 | -7.983 |
| MolPort-009-647-594 | -7.346 | -8.555 |

---

**Table S6.** Prediction of Synthetic Accessibility (SA) of the ligands.

| Ligand              | SA     |
|---------------------|--------|
| Hydroxychloroquine  | 69.792 |
| Chloroquine         | 70.325 |
| Lopinavir           | 36.612 |
| Ritonavir           | 32.899 |
| 11b                 | 47.747 |
| MolPort-009-219-532 | 81.768 |
| MolPort-010-847-948 | 68.495 |
| MolPort-005-116-387 | 71.440 |
| MolPort-006-521-801 | 66.419 |
| MolPort-009-089-697 | 71.324 |
| MolPort-028-816-982 | 32.472 |
| MolPort-005-026-316 | 56.301 |
| MolPort-002-297-028 | 77.504 |
| MolPort-004-996-519 | 68.009 |
| MolPort-009-239-957 | 63.779 |
| MolPort-005-060-605 | 67.338 |
| MolPort-005-028-274 | 67.051 |
| MolPort-044-400-535 | 74.829 |
| MolPort-005-695-540 | 76.412 |
| MolPort-007-913-256 | 57.312 |
| MolPort-005-008-705 | 68.168 |
| MolPort-004-042-669 | 67.940 |
| MolPort-007-913-111 | 65.579 |
| MolPort-007-913-243 | 71.178 |
| MolPort-002-693-933 | 79.254 |
| MolPort-005-083-430 | 59.789 |
| MolPort-010-232-623 | 70.187 |
| MolPort-002-513-970 | 45.605 |
| MolPort-007-913-196 | 70.662 |
| MolPort-005-131-430 | 61.351 |
| MolPort-001-683-506 | 73.593 |
| MolPort-044-684-282 | 74.706 |
| MolPort-009-499-144 | 76.392 |
| MolPort-005-002-644 | 50.303 |
| MolPort-009-647-594 | 67.407 |
